# Supplementary material
Source: MDPI journal article supplement (https://www.mdpi.com/1424-2818/16/2/125)
Supplement: s1 [file s1]

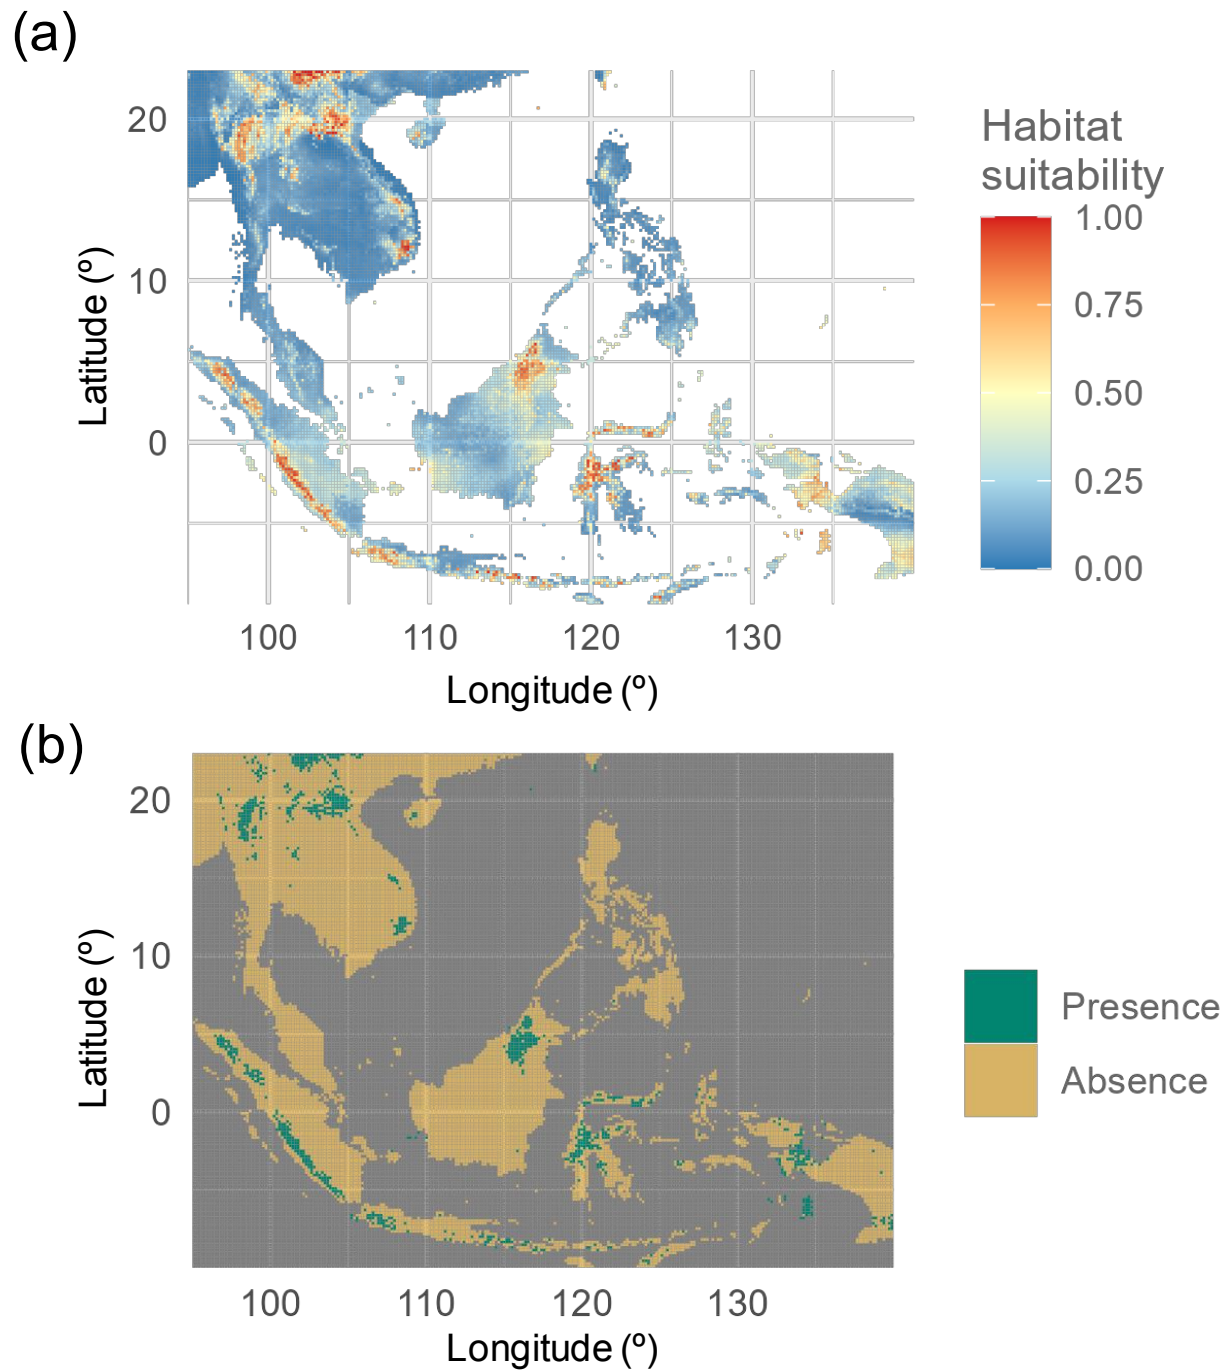

**Figure S1**

Future distribution of *Leucobryum aduncum* in year 2061-2080 under the scenario CMIP6 SSP2-4.5, model CNRM-CM6-1. (a) Future habitat suitability (b) Future presence-absence at the threshold 0.57.

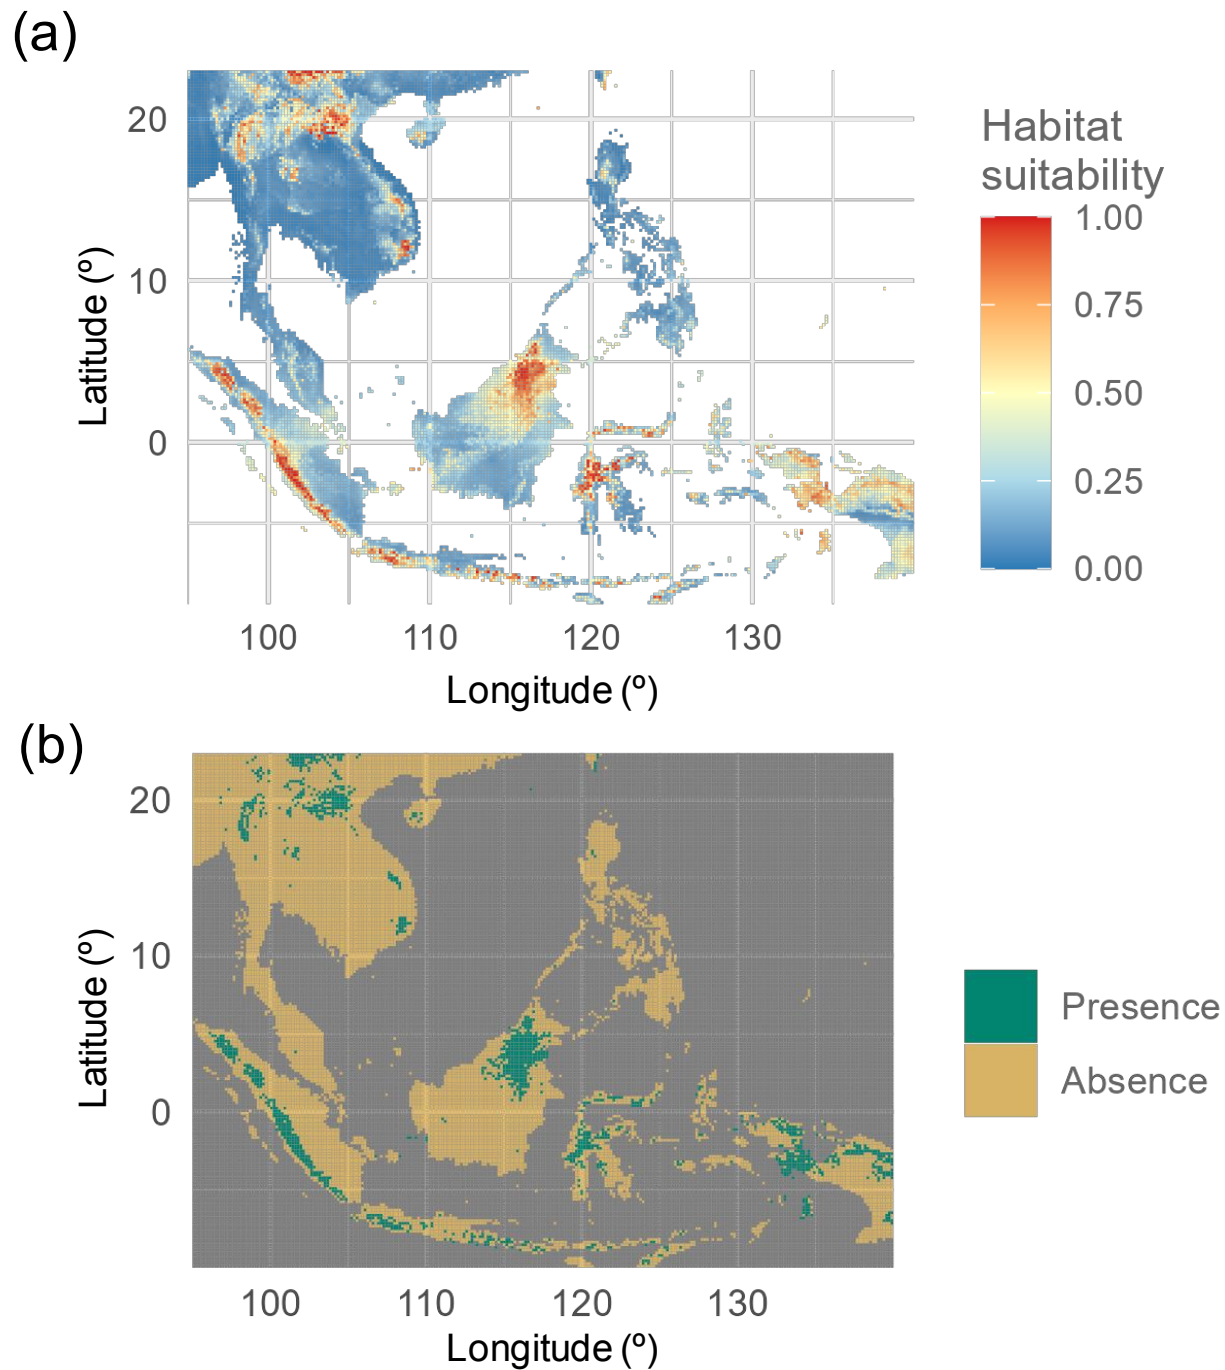

**Figure S2**

Future distribution of *Leucobryum aduncum* in year 2061-2080 under the scenario CMIP6 SSP2-4.5, model EC-Earth3-Veg. (a) Future habitat suitability (b) Future presence-absence at the threshold 0.57.

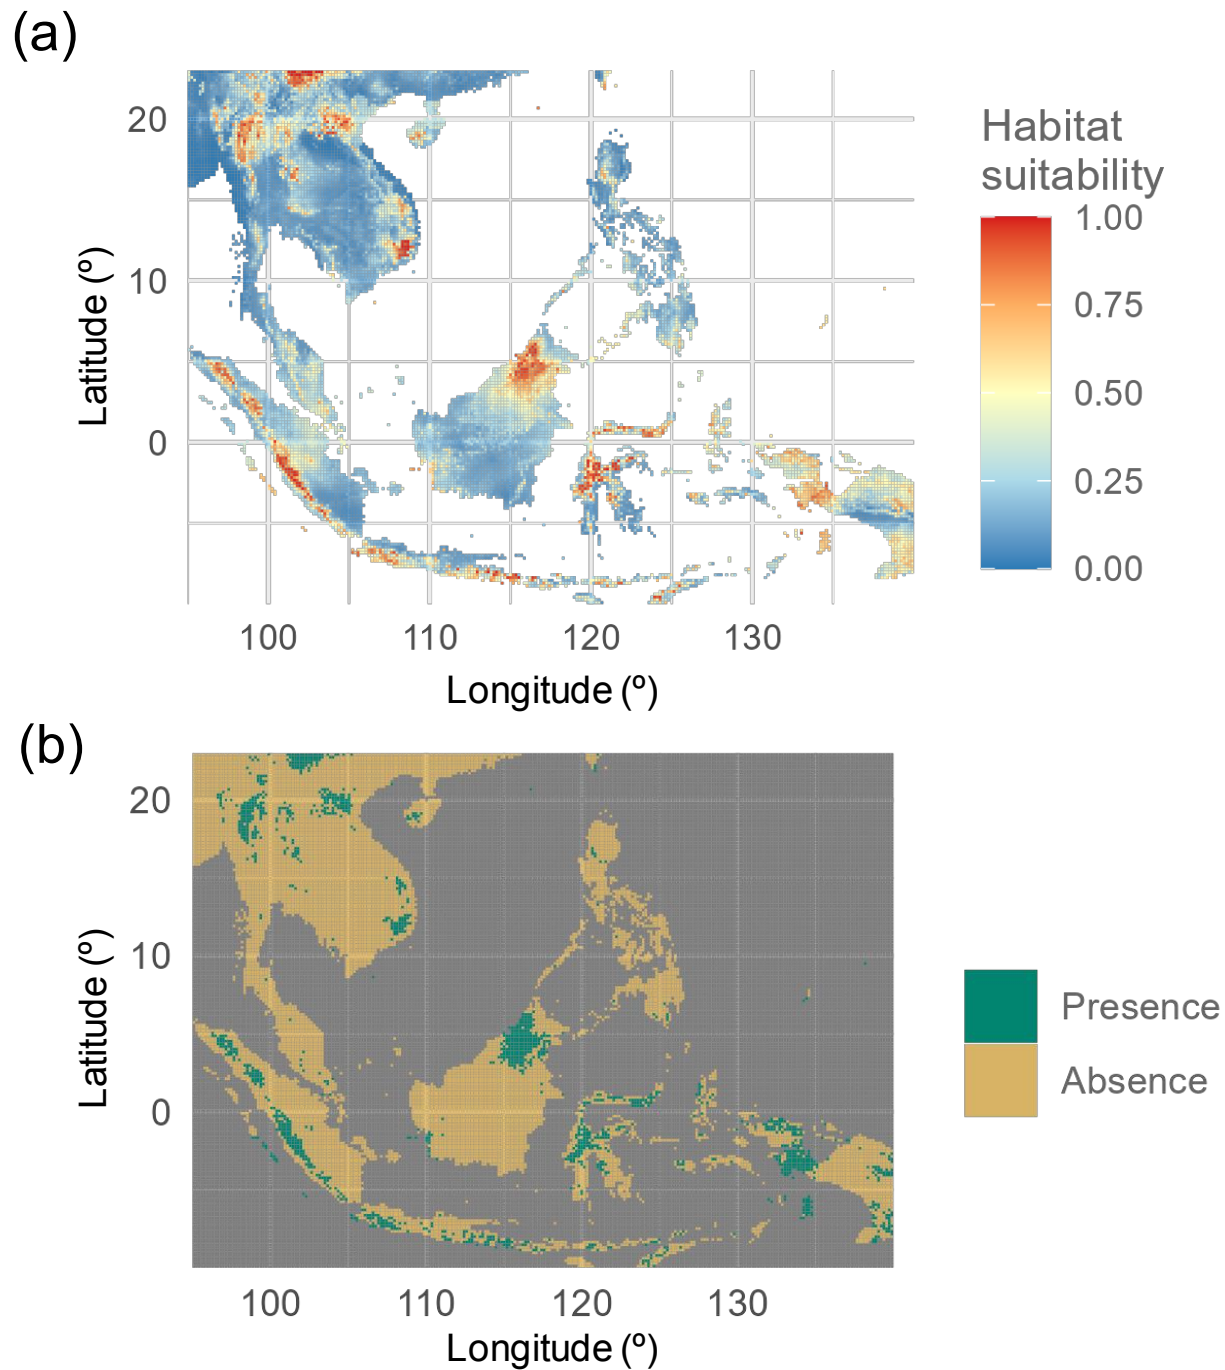

**Figure S3**

Future distribution of *Leucobryum aduncum* in year 2061-2080 under the scenario CMIP6 SSP2-4.5, model model MPI-ESM1-2-HR. (a) Future habitat suitability (b) Future presence-absence at the threshold 0.57.

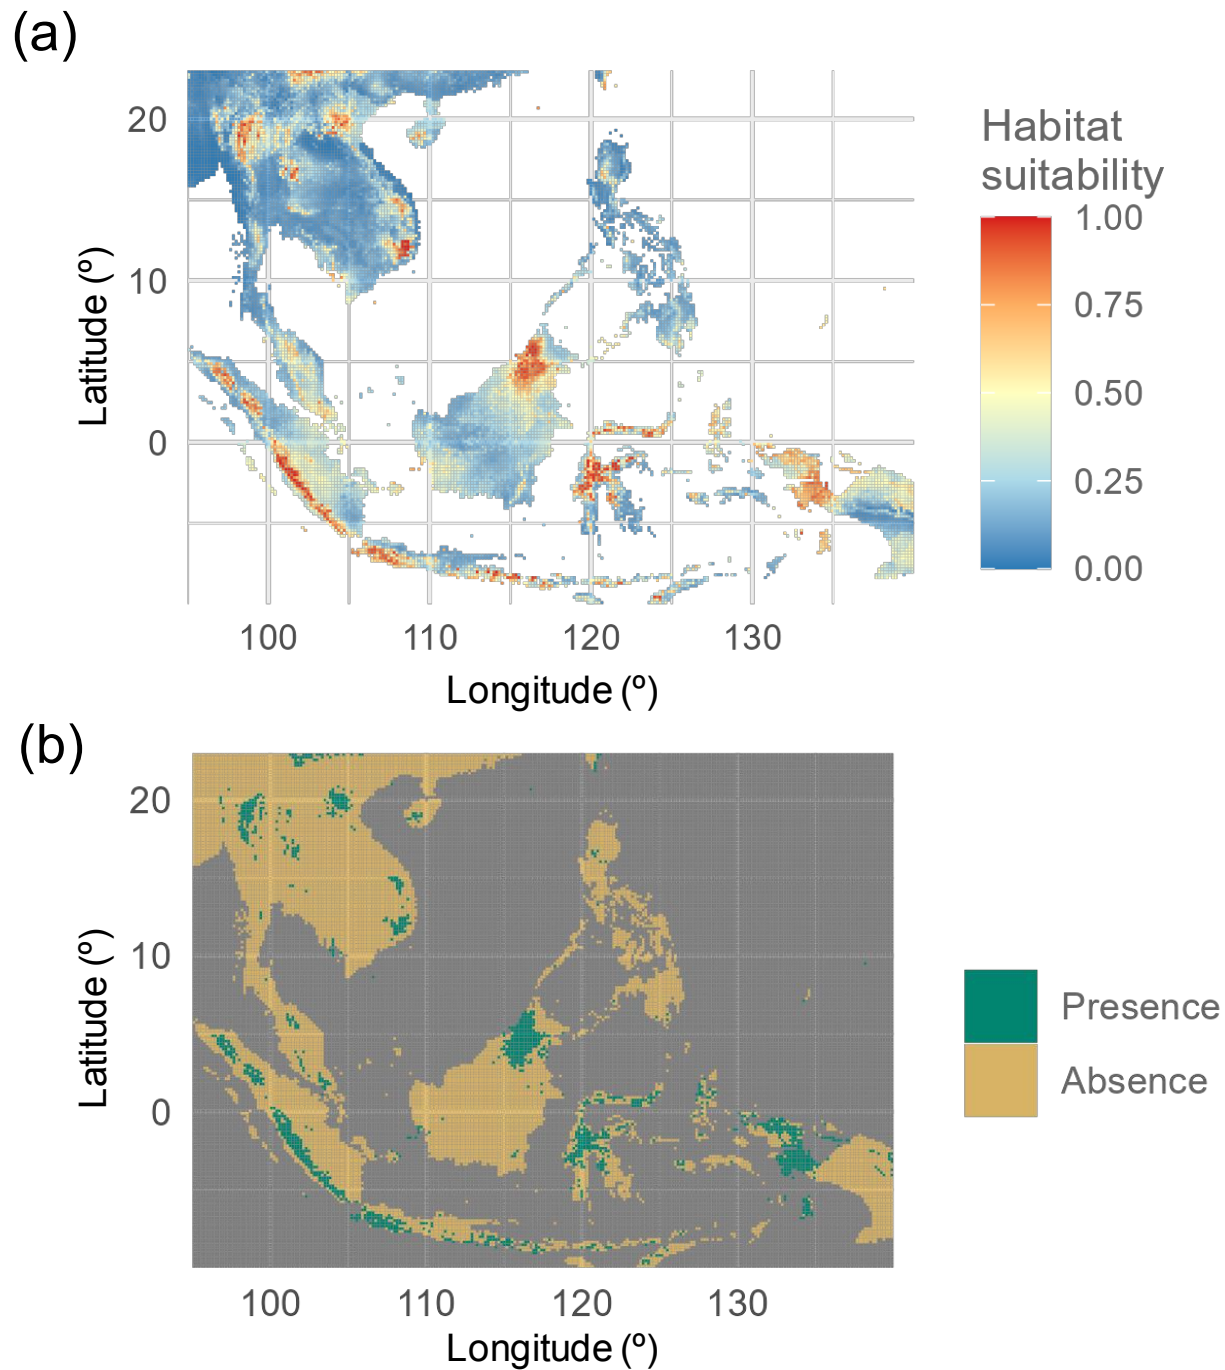

**Figure S4**

Future distribution of *Leucobryum aduncum* in year 2061-2080 under the scenario CMIP6 SSP2-4.5, model MPI-ESM1-2-LR. (a) Future habitat suitability (b) Future presence-absence at the threshold 0.57.



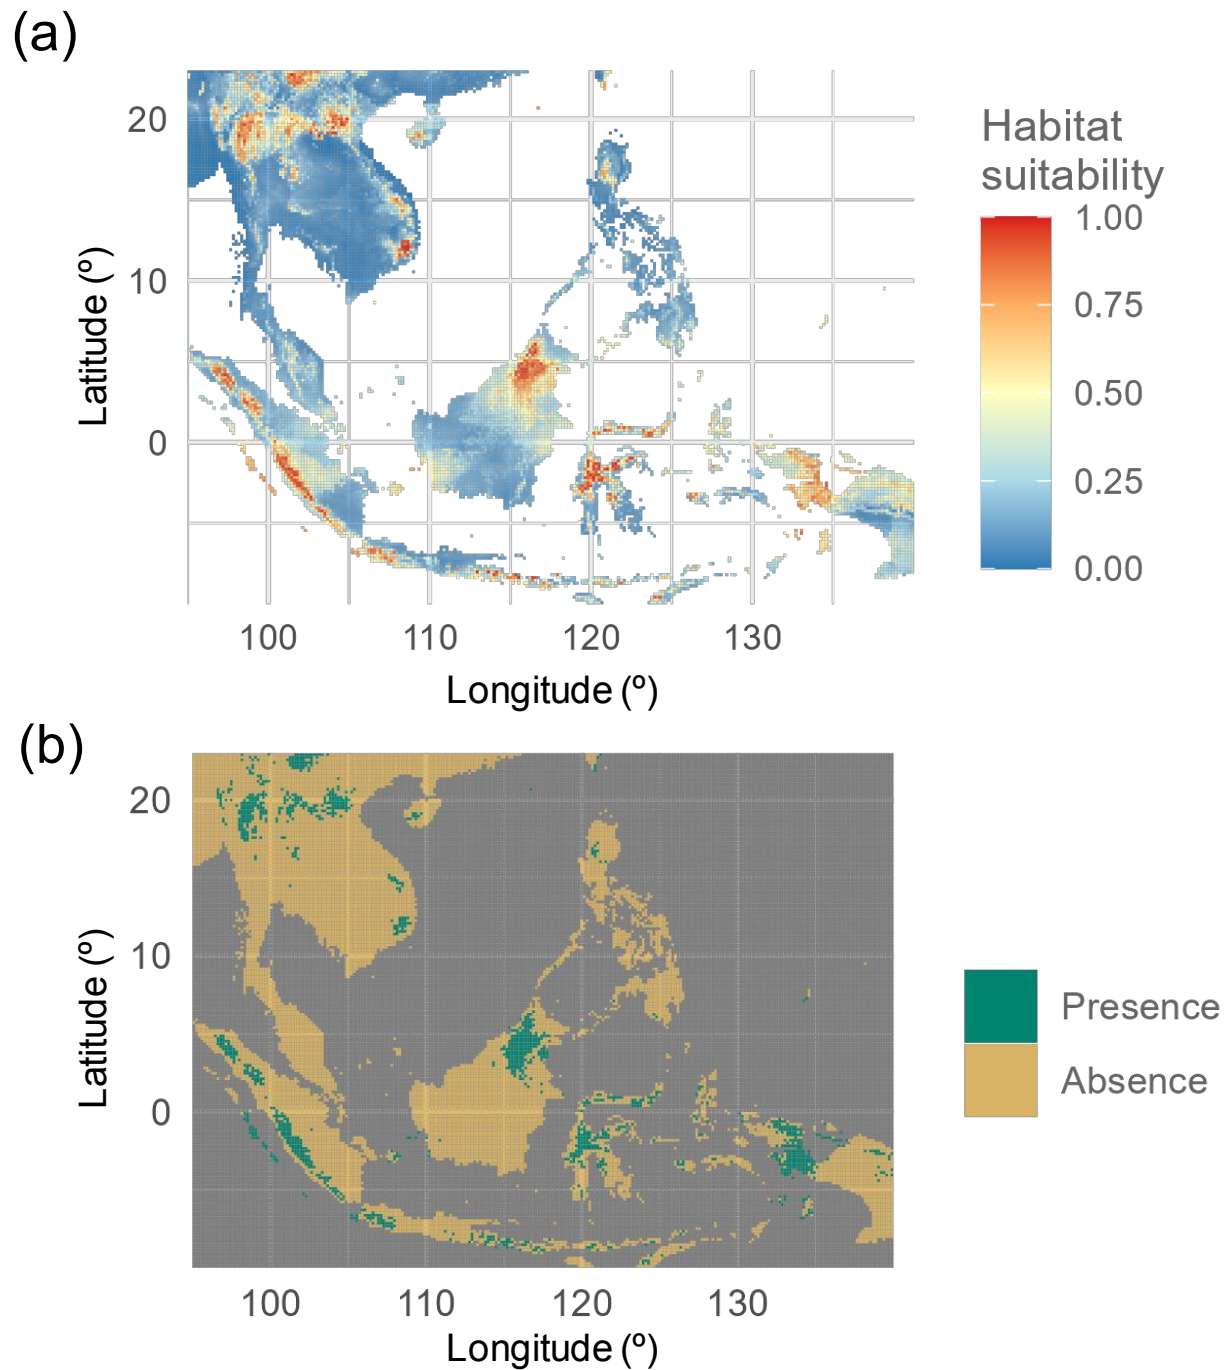

**Figure S5**

Future distribution of *Leucobryum aduncum* in year 2061-2080 under the scenario CMIP6 SSP2-4.5, model MRI-ESM2-0. (a) Future habitat suitability (b) Future presence-absence at the threshold 0.57.

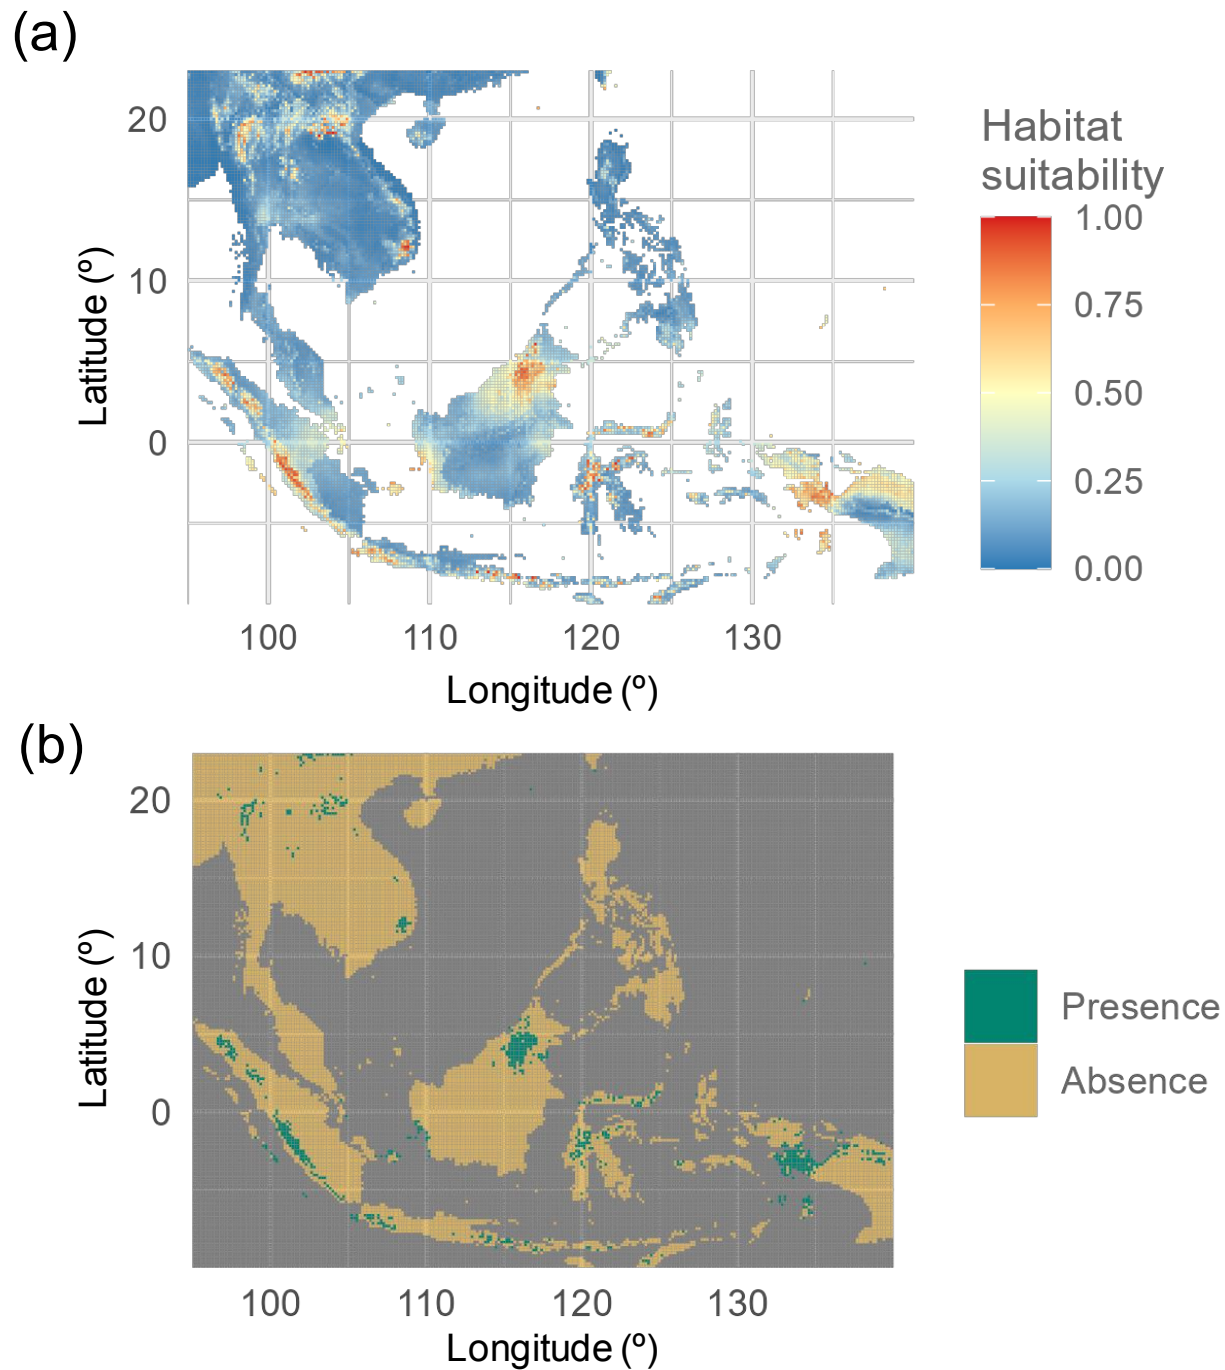

**Figure S6**

Future distribution of *Leucobryum aduncum* in year 2061-2080 under the scenario CMIP6 SSP2-4.5, model UKESM1-0-LL. (a) Future habitat suitability (b) Future presence-absence at the threshold 0.57.
